# Supplementary material for: Visible-light driven p–n heterojunction formed between α-Bi2O3 and Bi2O2CO3 for efficient photocatalytic degradation of tetracycline
Source: Royal Society of Chemistry journal article supplement (doi:10.1039/d2ra08162h), 2023-01-01
Supplement: d2ra08162h1.pdf [file d2ra08162h1.pdf]

## supplementary information

### Visible-light driven p-n heterojunction formed between $\alpha$ - $\text{Bi}_2\text{O}_3$ and $\text{Bi}_2\text{O}_2\text{CO}_3$ for efficient photocatalytic degradation of tetracycline

Baikang Zhu<sup>abd†</sup>, Qinbing Dong<sup>a†</sup>, Jianghua Huang<sup>a†</sup>, Debin Song<sup>a</sup>, Lihui Chen<sup>a</sup>, Qingguo Chen<sup>a</sup>, Chunyang Zhai<sup>c</sup>, Bohong Wang<sup>a\*</sup>, Jiří Jaromír Klemesš<sup>e\*</sup>, Hengcong Tao<sup>adf\*</sup>

*a School of Petrochemical Engineering & Environment, Zhejiang Ocean University, Zhoushan, 316022, China.*

*b United National-Local Engineering Laboratory of Oil & Gas Storage and Transportation Technology, Zhoushan, Zhejiang, 316022, China.*

*c School of Materials Science and Chemical Engineering, Ningbo University, Ningbo 315211, China.*

*d Zhejiang Provincial Key Laboratory of Petrochemical Environmental Pollution Control, Zhoushan, Zhejiang, 316022, China.*

*e Sustainable Process Integration Laboratory – SPIL, NETME Centre, Faculty of Mechanical Engineering, Brno University of Technology - VUT Brno, Technická 2896/2, 616 69, Brno, Czech Republic.*

*f College of Chemical and Biological Engineering, Zhejiang University, Hangzhou, 310058, China.*

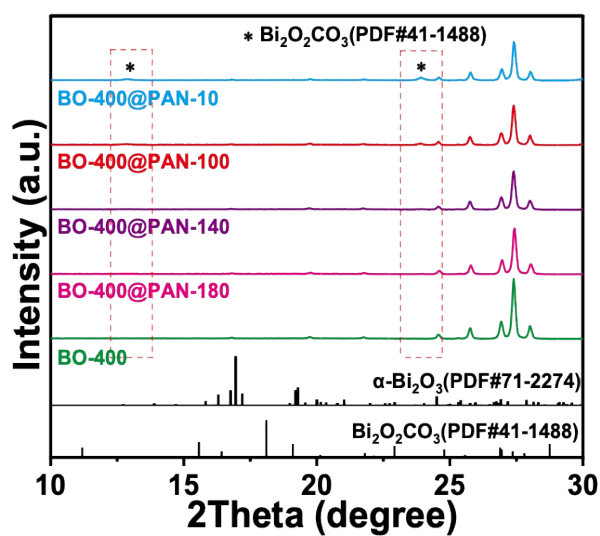

**Figure S1.** Polymer-modified  $\text{Bi}_2\text{O}_2\text{CO}_3$  with various molar ratios (polymer/ $\text{Bi}_2\text{O}_2\text{CO}_3$ ) calcined at 400 °C.

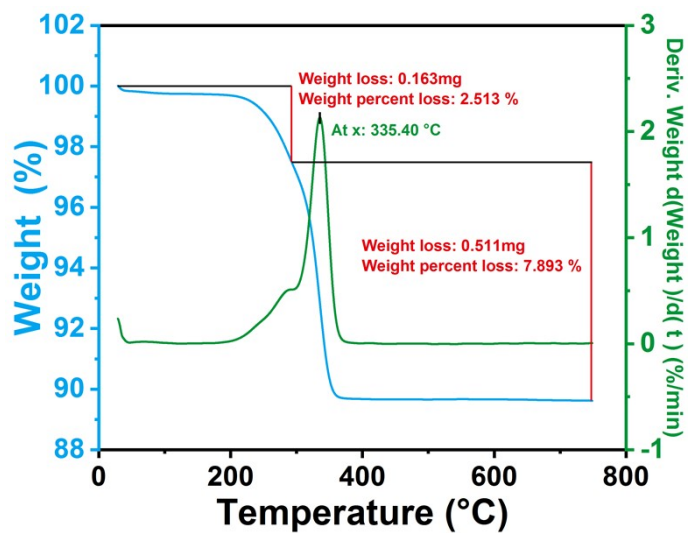

**Figure S2.** Thermogravimetric analysis curve of the precures

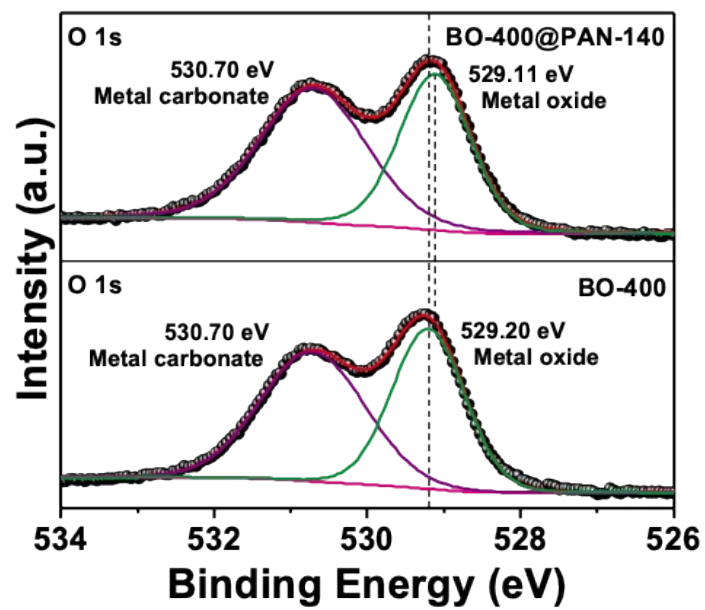

Figure S3. O 1s high resolution XPS spectrum of BO-400 and BOC@PAN-140

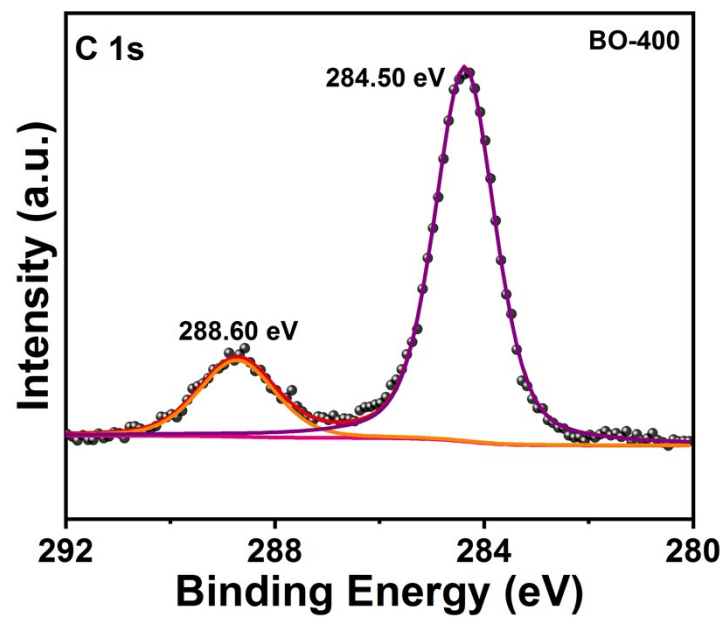

Figure S4. C 1s high resolution XPS spectrum of BO-400

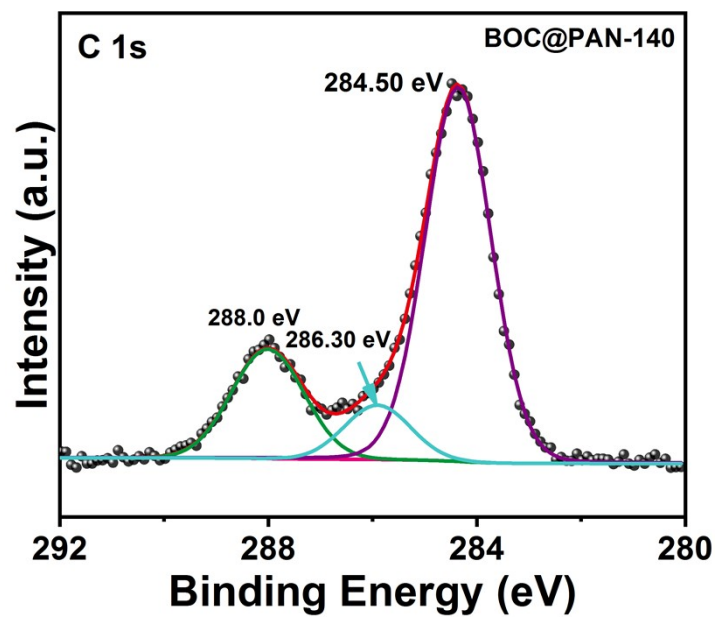

Figure S5. C 1s high resolution XPS spectrum of BOC@PAN-140

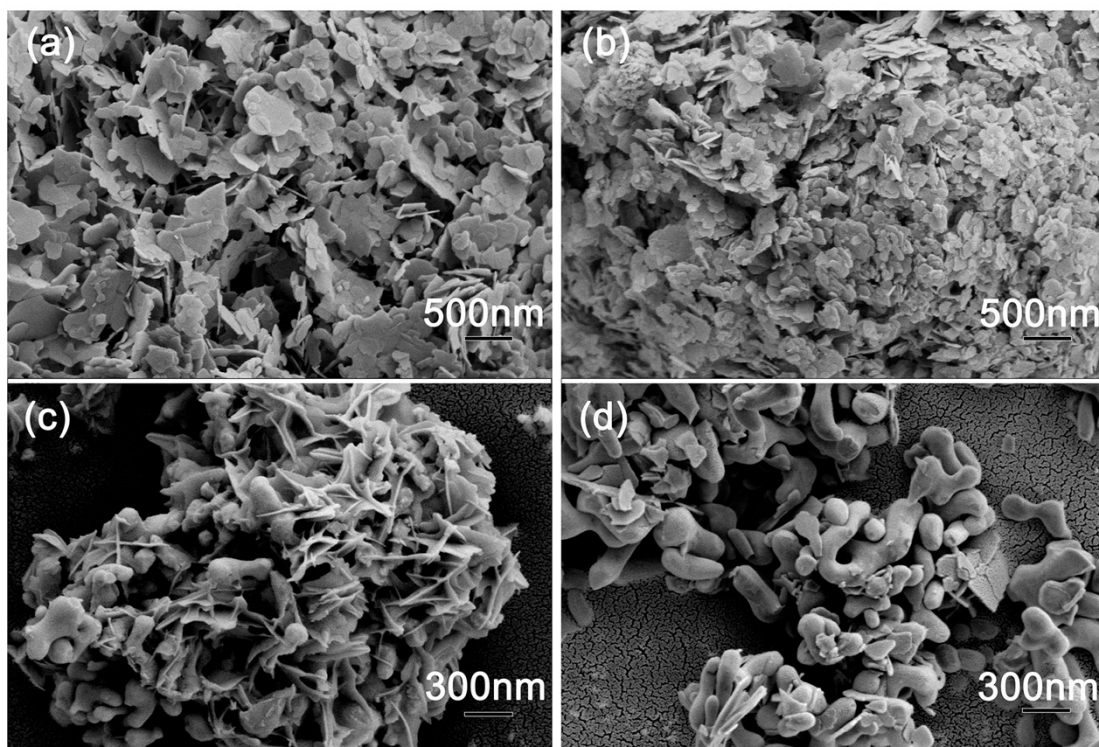

**Figure S6.** SEM images of (a) BO-300, (b) BO-300@PAN-140, (c) BO-400@PAN-100, (d) BO-400@PAN-180

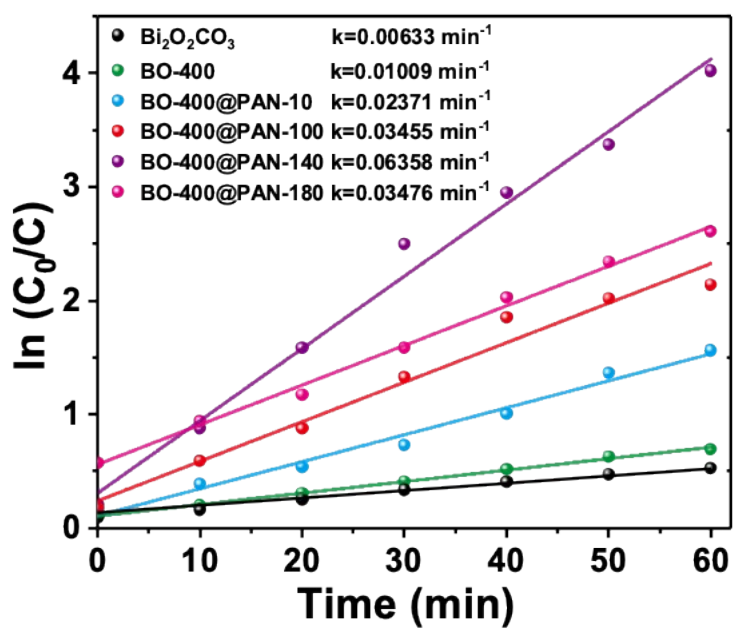

**Figure S7.** Kinetic fitting curves of  $\text{Bi}_2\text{O}_2\text{CO}_3$ , BO-400, BO-400@PAN-10, BO-400@PAN-100, BO-400@PAN-140 and BO-400@PAN-180 degradation TC.

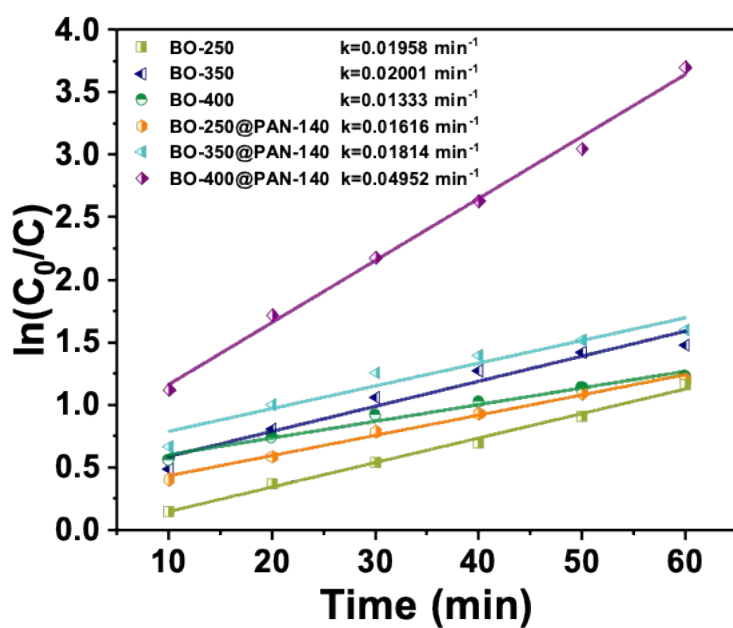

**Figure S8.** Kinetic fitting curves of  $\text{Bi}_2\text{O}_2\text{CO}_3$ , BO-250, BO-350, BO-400, BO-250@PAN-140, BO-350@PAN-140 and BO-400@PAN-140 degradation TC.

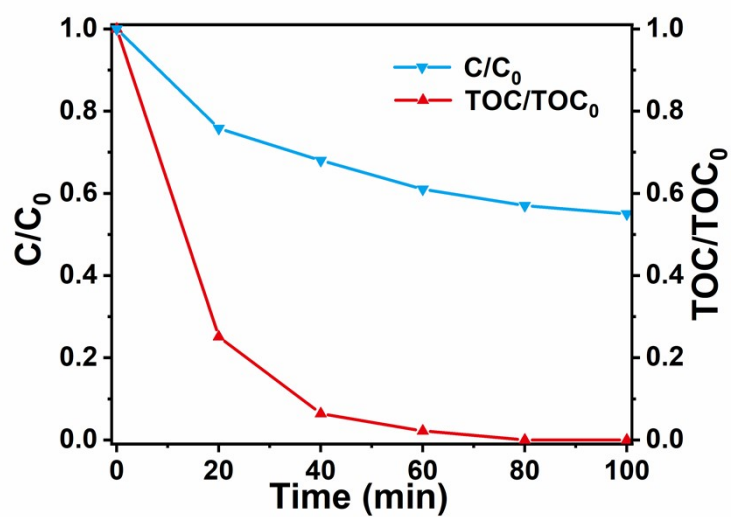

**Figure S9.** TOC measurement of TC solution degraded by BO-400@PAN-140 at fixed time intervals.

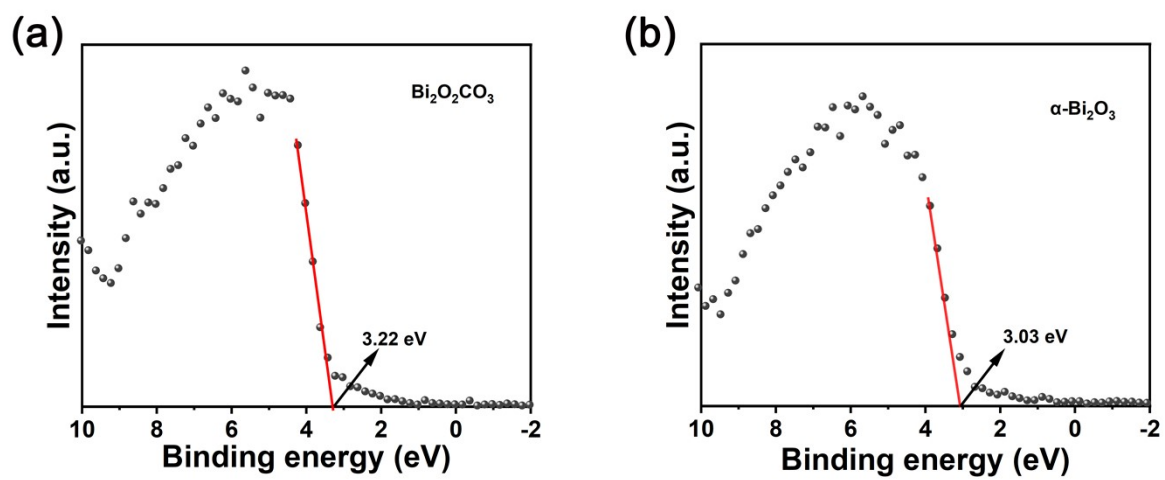

Figure S10. VB-XPS spectra of  $\text{Bi}_2\text{O}_2\text{CO}_3$  (a) and  $\alpha\text{-Bi}_2\text{O}_3$  (b).



**Table S1.** Band positions and band gaps of  $\text{Bi}_2\text{O}_2\text{CO}_3$  and  $\alpha\text{-Bi}_2\text{O}_3$

| Samples                            | Calculated VB position $E_{\text{VB}}$ (eV) | Calculated CB position $E_{\text{CB}}$ (eV) | Band gap $E_g$ (eV) |
|------------------------------------|---------------------------------------------|---------------------------------------------|---------------------|
| $\text{Bi}_2\text{O}_2\text{CO}_3$ | 3.22                                        | 0.26                                        | 2.96                |
| $\alpha\text{-Bi}_2\text{O}_3$     | 3.03                                        | 0.38                                        | 2.65                |

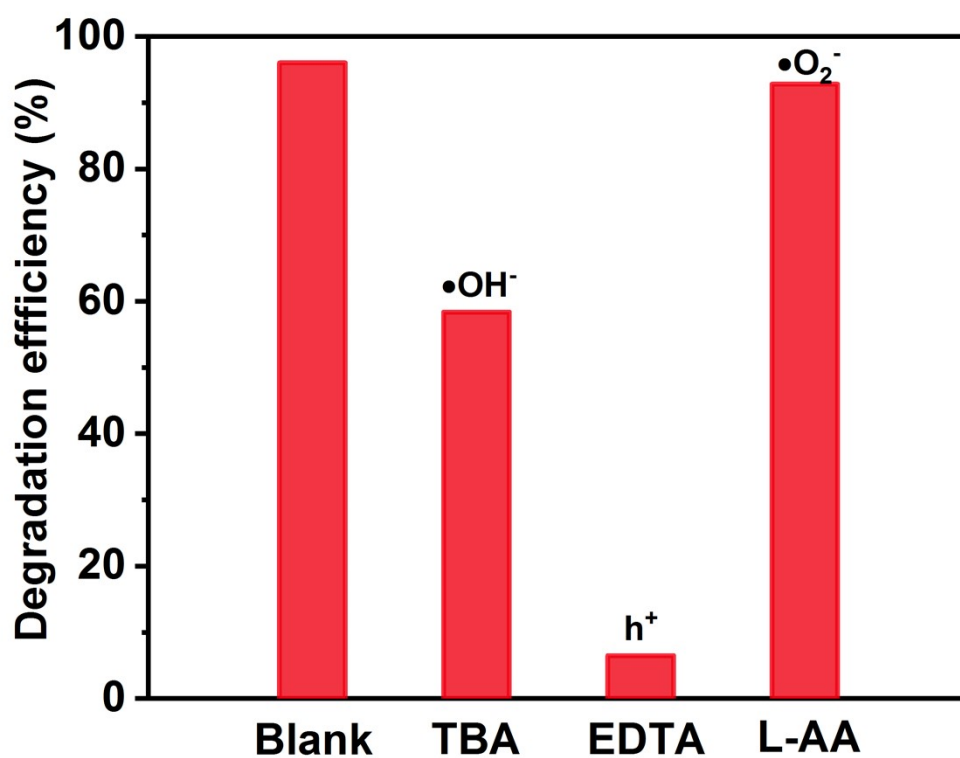

**Figure S11.** Effect of different quench agents on photocatalytic degradation of TC by photocatalytic composites.

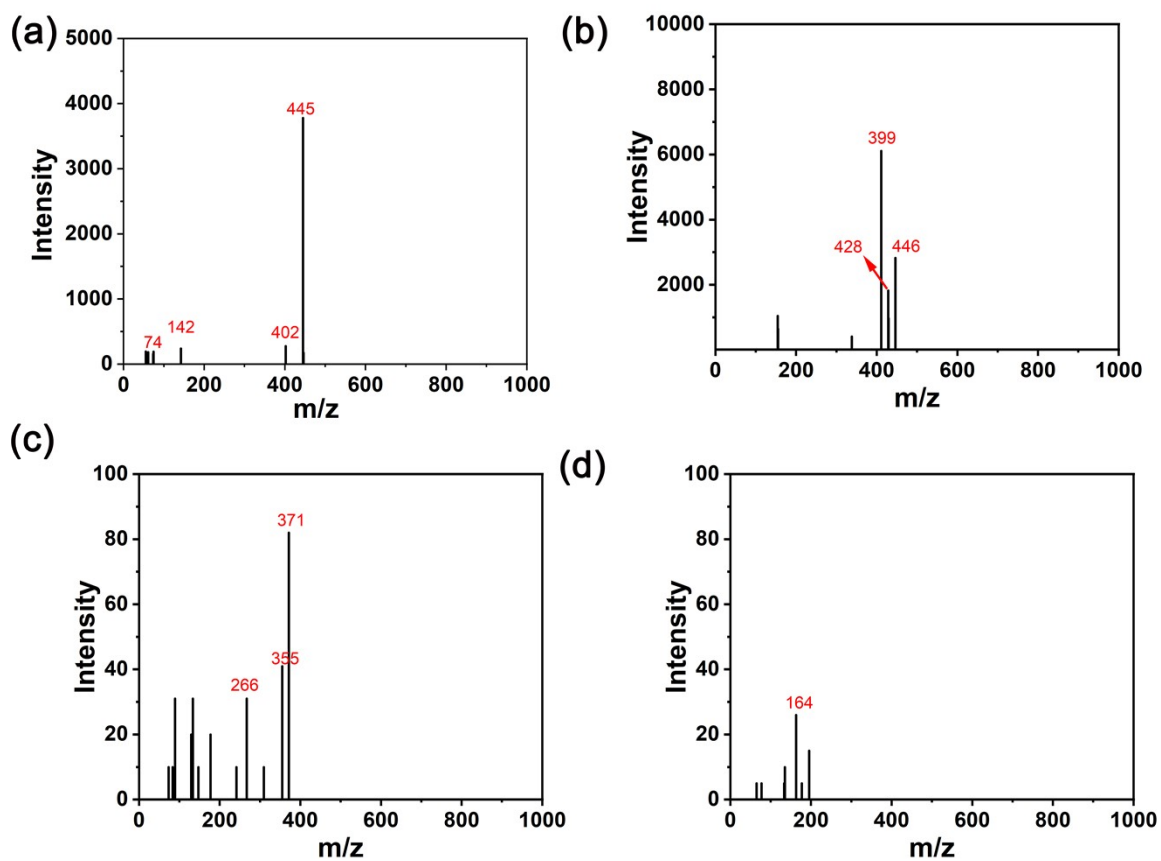

**Figure S12.** ESI-MS signals of the intermediates with BO-400@PAN-140 composite as photocatalyst.
